# Supplementary material for: Cohesin residency determines chromatin loop patterns
Source: eLife. 2020 Nov 10;9:e59889. doi: 10.7554/eLife.59889 (PMC7655110; doi:10.7554/eLife.59889)
Supplement: Supplementary file 1. [file elife-59889-supp1.xlsx]

## Sheet: Stats
Summary of Micro-C and Hi-C data used in this study:
SampleID	RepID	Assay	Treatment	Citation	Unique reads	Cis	Cis %	Trans	Trans %	IN-IN (→←)	IN-IN %	IN-OUT (→→)	IN-OUT %	OUT-IN (←←)	OUT-IN %	OUT-OUT (←→)	OUT-OUT %
WT	rep1	Micro-C	nocodazole	This study	22309785	20691056	0.927443	1618729	0.0725569	7936407	0.383567	4323321	0.208946	4322075	0.208886	4109253	0.1986
WT	rep2	Micro-C	nocodazole	This study	28200994	26482189	0.939052	1718805	0.0609484	10043179	0.379243	5555899	0.209798	5553816	0.209719	5329295	0.201241
brn1-AID	rep1	Micro-C	nocodazole	This study	20991941	19655690	0.936345	1336251	0.0636554	7713487	0.39243	4050670	0.206081	4051355	0.206116	3840178	0.195372
brn1-AID	rep2	Micro-C	nocodazole	This study	21240900	19690800	0.927023	1550100	0.0729771	7354780	0.373514	4148239	0.210669	4155921	0.211059	4031860	0.204759
mcd1-AID	rep1	Micro-C	nocodazole	This study	24310915	20949733	0.861742	3361182	0.138258	8793378	0.419737	4123583	0.196832	4122642	0.196787	3910130	0.186643
mcd1-AID	rep2	Micro-C	nocodazole	This study	22993211	19823825	0.86216	3169386	0.13784	8085706	0.407878	3975874	0.20056	3968999	0.200214	3793246	0.191348
mcd1-AID_brn1-AID	rep1	Micro-C	nocodazole	This study	27094579	23591427	0.870707	3503152	0.129293	11132843	0.471902	4243277	0.179865	4237957	0.17964	3977350	0.168593
mcd1-AID_brn1-AID	rep2	Micro-C	nocodazole	This study	19770738	17169182	0.868414	2601556	0.131586	8061302	0.469522	3096079	0.180328	3095877	0.180316	2915924	0.169835
wpl1-AID	rep1	Micro-C	nocodazole	This study	39855817	31390614	0.787604	8465203	0.212396	11275648	0.359204	6838574	0.217854	6831813	0.217639	6444579	0.205303
wpl1-AID	rep2	Micro-C	nocodazole	This study	48644281	31078916	0.638902	17565365	0.361098	10205706	0.32838	7115864	0.228961	7111948	0.228835	6645398	0.213823
pds5-AID	rep1	Micro-C	nocodazole	This study	46021365	30347122	0.659414	15674243	0.340586	10186426	0.335664	6877039	0.226613	6877071	0.226614	6406586	0.21111
WT_30C_15min	rep1	Micro-C	alpha-factor release	This study	72906975	58768931	0.806081	14138044	0.193919	27435345	0.466834	10677976	0.181694	10679765	0.181725	9975845	0.169747
WT_30C_30min	rep1	Micro-C	alpha-factor release	This study	64513802	52247672	0.809868	12266130	0.190132	27371270	0.523875	8506687	0.162815	8505522	0.162792	7864193	0.150518
WT_30C_45min	rep1	Micro-C	alpha-factor release	This study	61039168	50760375	0.831603	10278793	0.168397	26553408	0.523113	8267122	0.162866	8262583	0.162776	7677262	0.151245
WT_30C_60min	rep1	Micro-C	alpha-factor release	This study	50605863	42156366	0.833033	8449497	0.166967	20242798	0.480184	7483878	0.177527	7478819	0.177407	6950871	0.164883
WT_30C_75min	rep1	Micro-C	alpha-factor release	This study	54569986	43900009	0.804472	10669977	0.195528	20558409	0.468301	7953895	0.181182	7938263	0.180826	7449442	0.169691
WT_30C_90min	rep1	Micro-C	alpha-factor release	This study	50105858	39901669	0.796347	10204189	0.203653	23185051	0.581055	5724326	0.143461	5718950	0.143326	5273342	0.132158
WT_23C_15min	rep1	Micro-C	alpha-factor release	This study	43257757	30537167	0.705935	12720590	0.294065	9967401	0.326402	7065353	0.231369	7057204	0.231102	6447209	0.211127
WT_23C_30min	rep1	Micro-C	alpha-factor release	This study	39678652	25960597	0.654271	13718055	0.345729	8233303	0.317146	6007442	0.231406	6018189	0.23182	5701663	0.219628
WT_23C_45min	rep1	Micro-C	alpha-factor release	This study	46701072	34064364	0.729413	12636708	0.270587	10667283	0.313151	7994811	0.234697	7990700	0.234577	7411570	0.217575
WT_23C_60min	rep1	Micro-C	alpha-factor release	This study	44479905	34979719	0.786416	9500186	0.213584	10492581	0.299962	8332903	0.238221	8333690	0.238243	7820545	0.223574
WT_23C_75min	rep1	Micro-C	alpha-factor release	This study	46287117	35316585	0.76299	10970532	0.23701	10697711	0.302909	8318478	0.23554	8317186	0.235504	7983210	0.226047
WT_23C_90min	rep1	Micro-C	alpha-factor release	This study	43036219	29458197	0.684498	13578022	0.315502	9369332	0.318055	6820461	0.23153	6816410	0.231393	6451994	0.219022
WT_23C_105min	rep1	Micro-C	alpha-factor release	This study	49601139	31478736	0.634637	18122403	0.365363	10082856	0.320307	7291195	0.231623	7280883	0.231295	6823802	0.216775
WT_23C_120min	rep1	Micro-C	alpha-factor release	This study	51268294	33461057	0.652666	17807237	0.347334	10515257	0.314254	7744879	0.231459	7744511	0.231448	7456410	0.222838
BY4741-WT	pooled	Micro-C	Asynchronous	Hsieh et al (2016) Nature Method	240270017	195734604	0.814644	44535413	0.185356	85140901	0.434981	37378610	0.190966	37471898	0.191442	35743195	0.182611
W303-WT	rep1	Hi-C	nocodazole	Paldi et al (2020) Nature	18828219	13527773	0.718484	5300446	0.281516	3475389	0.256908	3108983	0.229822	3081225	0.22777	3862176	0.2855
MJ6-WT	rep1	Hi-C	nocodazole	Scahlbetter et al (2019) Nature communications	44704482	31499028	0.704606	13205454	0.295394	8248570	0.261867	7729518	0.245389	7652946	0.242958	7867994	0.249785
MJ6-WT	rep2	Hi-C	nocodazole	Scahlbetter et al (2019) Nature communications	71921192	48973576	0.680934	22947616	0.319066	12692799	0.259176	12053895	0.246131	11897842	0.242944	12329040	0.251749
W303-WT	rep1	Hi-C	nocodazole	Schalbetter et al (2017) Nature Cell Biology	51680396	31625317	0.61194	20055079	0.38806	8450112	0.267195	7828901	0.247552	7801931	0.246699	7544373	0.238555
W303-WT	rep2	Hi-C	nocodazole	Schalbetter et al (2017) Nature Cell Biology	70506798	38961218	0.552588	31545580	0.447412	10252165	0.263138	9616766	0.246829	9566418	0.245537	9525869	0.244496
cdc20	pooled	Hi-C	-	Dauban et al (2020) Molecular Cell	50642810	37238369	0.735314	13404441	0.264686	14562419	0.277349	12839938	0.244543	12777339	0.243351	12326145	0.234758
cdc20,scc1-AID	pooled	Hi-C	-	Dauban et al (2020) Molecular Cell	34443239	20317039	0.58987	14126200	0.41013	10084995	0.286426	8442257	0.239771	8427265	0.239345	8255214	0.234458

## Sheet: Reproducibility
Reproducibility score (by GenomeDisco)	WT	BRN1-AID	MCD1-AID	BRN1-AID MCD1-AID	WPL-AID
chr1	0.888	0.834	0.878	0.862	0.799
chr10	0.897	0.857	0.878	0.864	0.81
chr11	0.918	0.871	0.896	0.882	0.826
chr12	0.911	0.855	0.88	0.867	0.772
chr13	0.905	0.863	0.885	0.868	0.8
chr14	0.917	0.868	0.895	0.877	0.809
chr15	0.899	0.861	0.877	0.859	0.781
chr16	0.905	0.857	0.879	0.864	0.802
chr2	0.903	0.859	0.88	0.864	0.793
chr3	0.923	0.866	0.905	0.897	0.863
chr4	0.89	0.855	0.865	0.84	0.736
chr5	0.914	0.858	0.892	0.878	0.84
chr6	0.929	0.87	0.909	0.911	0.851
chr7	0.9	0.859	0.877	0.855	0.783
chr8	0.906	0.853	0.888	0.87	0.826
chr9	0.912	0.867	0.902	0.887	0.844
chrALL	0.907313	0.859563	0.886625	0.871562	0.808437
ChrIV
WT
BRN1-AID
MCD1-AID
BRN1-AID MCD1-AID
WPL-AID
