# Supplementary material for: Cohesin residency determines chromatin loop patterns
Source: eLife. 2020 Nov 10;9:e59889. doi: 10.7554/eLife.59889 (PMC7655110; doi:10.7554/eLife.59889)
Supplement: Supplementary file 2. [file elife-59889-supp2.xlsx]

## Sheet: Sheet1
Summary of loop calling:
SampleID	HICCUPS Loop #	Chromosight Loop #
WT	732	882
brn1-AID	585	-
mcd1-AID	4	-
mcd1-AID_brn1-AID	4	-
wpl1-AID	1588	-
pds5-AID	301	-
Hsieh (2016)	99	41
Schalbetter (2019)	71	-
Paldi (2020)	166	-
